# Supplementary material
Source: PubMed Central journal article supplement (PMC8080261)

# Supplementary Figure S1

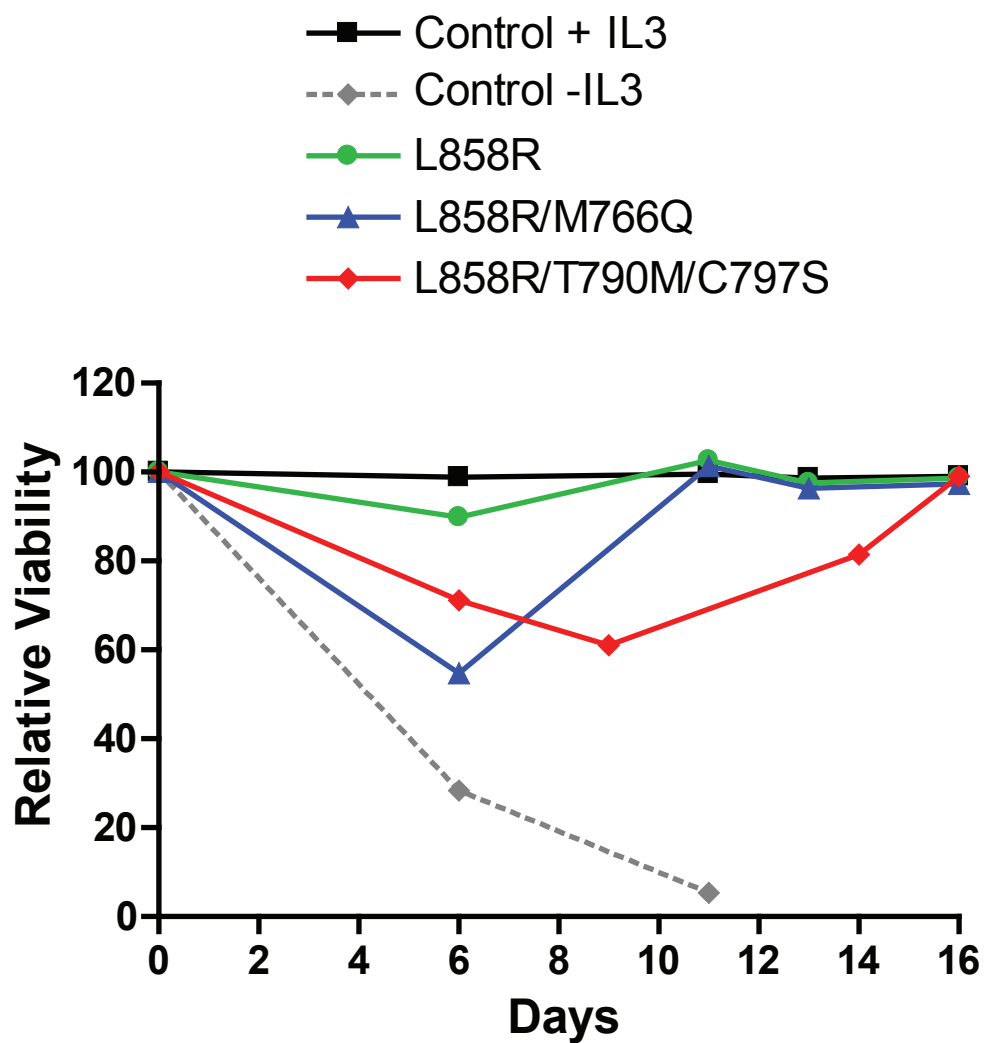

Supplement: NIHMS1694208-supplement-1.pdf [file NIHMS1694208-supplement-1.pdf]

# Supplementary Figure S2

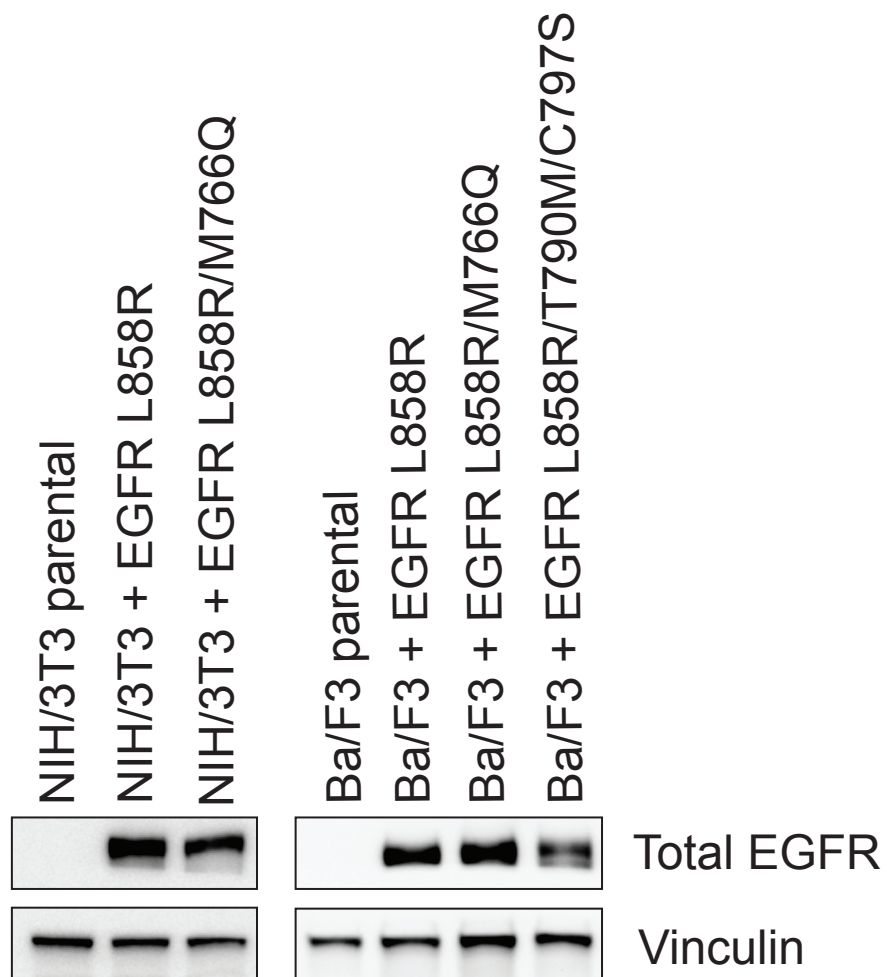

Supplement: NIHMS1694208-supplement-2.pdf [file NIHMS1694208-supplement-2.pdf]
